# Supplementary material
Source: PubMed Central journal article supplement (PMC7269342)
Supplement: ASN.2019070745SupplementaryData.pdf [file ASN.2019070745SupplementaryData.pdf]

# Supplemental Material

## TABLE OF CONTENTS

**Supplemental Table 1.** Predictor variables used to create parsimonious prediction models.

**Supplemental Table 2.** Comparing demographic and clinical characteristics according to development of AKI in the derivation cohort.

**Supplemental Table 3.** Regression-based prediction models coefficients and odds ratios.

**Supplemental Table 4:** Genetic algorithm model operating points applied to the internal validation cohort.

**Supplemental Table 5:** Genetic algorithm model operating points applied to the external validation cohort.

**Supplemental Table 6:** Low-risk cut-off threshold (0.08) analysis using the genetic algorithm model in age subgroups (on the internal validation cohort).

**Supplemental Table 7:** High-risk cut-off threshold (0.24) analysis using the genetic algorithm model in age subgroups (on the internal validation cohort).

**Supplemental Figure 1:** Logistic regression analyses of incremental numbers of variables of the stepwise forward selection model.

**Supplemental Figure 2.** Genetic algorithm feature selection process.

**Supplemental Figure 3:** Convergence in evaluation set (of derivation cohort) area under the receiver operating characteristic curve (AUC) of the genetic algorithm's population.

**Supplemental Figure 4:** Genetic algorithm model calibration curves.

**Supplemental Figure 5:** Genetic algorithm model performance illustrated by a precision-recall curve.

**Supplemental Figure 6.** Genetic model for the prediction of severe AKI and subgroup analyses in the internal validation cohort.

**Supplemental Methods:** Genetic Algorithm Methodology.

**Supplemental Table 1.** Predictor variables used to create parsimonious prediction models.

| <b>Demographic variables (n=7)</b>                                                                                                                                                                                                                                                                                                                                                                                                                                                                                                                                     |                                                                                                                                                                                                                                                                                                                                                                                                                                                                                                                                                                                                             |                                                                                                                                                                                                                                                                                                                                                                                                                                                                                                                                                                                                                  |                                                                                                                                                                                                                                                                                                                                                                                                                                                                                                                                         |                                                                                                                                                                                                |
|------------------------------------------------------------------------------------------------------------------------------------------------------------------------------------------------------------------------------------------------------------------------------------------------------------------------------------------------------------------------------------------------------------------------------------------------------------------------------------------------------------------------------------------------------------------------|-------------------------------------------------------------------------------------------------------------------------------------------------------------------------------------------------------------------------------------------------------------------------------------------------------------------------------------------------------------------------------------------------------------------------------------------------------------------------------------------------------------------------------------------------------------------------------------------------------------|------------------------------------------------------------------------------------------------------------------------------------------------------------------------------------------------------------------------------------------------------------------------------------------------------------------------------------------------------------------------------------------------------------------------------------------------------------------------------------------------------------------------------------------------------------------------------------------------------------------|-----------------------------------------------------------------------------------------------------------------------------------------------------------------------------------------------------------------------------------------------------------------------------------------------------------------------------------------------------------------------------------------------------------------------------------------------------------------------------------------------------------------------------------------|------------------------------------------------------------------------------------------------------------------------------------------------------------------------------------------------|
| <ul style="list-style-type: none"> <li>• Age</li> <li>• Ethnicity</li> </ul>                                                                                                                                                                                                                                                                                                                                                                                                                                                                                           | <ul style="list-style-type: none"> <li>• Height</li> <li>• Race</li> </ul>                                                                                                                                                                                                                                                                                                                                                                                                                                                                                                                                  | <ul style="list-style-type: none"> <li>• Sex</li> <li>• Time since admission<sup>a</sup></li> </ul>                                                                                                                                                                                                                                                                                                                                                                                                                                                                                                              | <ul style="list-style-type: none"> <li>• Weight</li> </ul>                                                                                                                                                                                                                                                                                                                                                                                                                                                                              |                                                                                                                                                                                                |
| <b>Vital signs (n=6)</b>                                                                                                                                                                                                                                                                                                                                                                                                                                                                                                                                               |                                                                                                                                                                                                                                                                                                                                                                                                                                                                                                                                                                                                             |                                                                                                                                                                                                                                                                                                                                                                                                                                                                                                                                                                                                                  |                                                                                                                                                                                                                                                                                                                                                                                                                                                                                                                                         |                                                                                                                                                                                                |
| <ul style="list-style-type: none"> <li>• Arterial line diastolic blood pressure</li> </ul>                                                                                                                                                                                                                                                                                                                                                                                                                                                                             | <ul style="list-style-type: none"> <li>• Diastolic blood pressure</li> <li>• Heart rate</li> </ul>                                                                                                                                                                                                                                                                                                                                                                                                                                                                                                          | <ul style="list-style-type: none"> <li>• Oxygen saturation</li> <li>• Respiratory rate</li> </ul>                                                                                                                                                                                                                                                                                                                                                                                                                                                                                                                | <ul style="list-style-type: none"> <li>• Systolic blood pressure</li> </ul>                                                                                                                                                                                                                                                                                                                                                                                                                                                             |                                                                                                                                                                                                |
| <b>Locations variables (n=24)</b>                                                                                                                                                                                                                                                                                                                                                                                                                                                                                                                                      |                                                                                                                                                                                                                                                                                                                                                                                                                                                                                                                                                                                                             |                                                                                                                                                                                                                                                                                                                                                                                                                                                                                                                                                                                                                  |                                                                                                                                                                                                                                                                                                                                                                                                                                                                                                                                         |                                                                                                                                                                                                |
| <ul style="list-style-type: none"> <li>• Cardiology</li> <li>• Catheter lab</li> <li>• CTICU</li> <li>• Emergency room</li> <li>• Endoscopy suite</li> <li>• General pediatrics</li> </ul>                                                                                                                                                                                                                                                                                                                                                                             | <ul style="list-style-type: none"> <li>• Hematology/oncology</li> <li>• Interventional radiology</li> <li>• Maternity</li> <li>• MICU</li> <li>• Neurological ICU</li> <li>• Neurology</li> </ul>                                                                                                                                                                                                                                                                                                                                                                                                           | <ul style="list-style-type: none"> <li>• NICU</li> <li>• Nursery</li> <li>• Perioperative</li> <li>• PICU</li> <li>• Psychiatry</li> </ul>                                                                                                                                                                                                                                                                                                                                                                                                                                                                       | <ul style="list-style-type: none"> <li>• SICU</li> <li>• Surgery</li> <li>• Surgical oncology</li> <li>• Transplant</li> <li>• Transport</li> </ul>                                                                                                                                                                                                                                                                                                                                                                                     |                                                                                                                                                                                                |
| <b>Procedures variables (n=85)</b>                                                                                                                                                                                                                                                                                                                                                                                                                                                                                                                                     |                                                                                                                                                                                                                                                                                                                                                                                                                                                                                                                                                                                                             |                                                                                                                                                                                                                                                                                                                                                                                                                                                                                                                                                                                                                  |                                                                                                                                                                                                                                                                                                                                                                                                                                                                                                                                         |                                                                                                                                                                                                |
| <ul style="list-style-type: none"> <li>• Abdomen CT</li> <li>• Abdomen MR</li> <li>• Abdomen US</li> <li>• Abdomen XR</li> <li>• Arterial line placement</li> <li>• Autopsy</li> <li>• Biopsy</li> <li>• BiPAP</li> <li>• Blood culture</li> <li>• Bone XR</li> <li>• Car seat test</li> <li>• Cardiac catheter</li> <li>• Central line</li> <li>• Chest CT</li> <li>• Chest MR</li> <li>• Chest PT</li> <li>• Chest XR</li> <li>• Comfort code order</li> <li>• Consult DART</li> <li>• Contact precaution order</li> <li>• Contrast study</li> <li>• CPAP</li> </ul> | <ul style="list-style-type: none"> <li>• Critical care transport</li> <li>• Head CT</li> <li>• Head MR</li> <li>• Educational US</li> <li>• EEG</li> <li>• ETT adjustment</li> <li>• Extremities CT</li> <li>• Extremities MR</li> <li>• Extubation</li> <li>• Fall risk order</li> <li>• Feeding tube</li> <li>• Fluoroscopy study</li> <li>• Foley catheter</li> <li>• Foreign body XR</li> <li>• Full code status</li> <li>• Gadolinium study</li> <li>• Head US</li> <li>• HFOV</li> <li>• High flow oxygen</li> <li>• Hip US</li> <li>• Contrast IR procedure</li> <li>• Isolette placement</li> </ul> | <ul style="list-style-type: none"> <li>• Limited code order</li> <li>• Liver diet</li> <li>• Low salt diet</li> <li>• Mechanical ventilation</li> <li>• Neonatal abstinence score</li> <li>• NIPPV</li> <li>• Nitric oxide</li> <li>• NPO order</li> <li>• Nuclear scan</li> <li>• Oxygen</li> <li>• Paracentesis</li> <li>• Phototherapy</li> <li>• Physical therapy</li> <li>• PICC placement</li> <li>• PICU consult</li> <li>• Plasma transfusion</li> <li>• Plasmapheresis</li> <li>• Platelet transfusion</li> <li>• Posttransfusion reaction</li> <li>• RBC transfusion</li> <li>• Rectal tube</li> </ul> | <ul style="list-style-type: none"> <li>• Renal diet</li> <li>• Renal US</li> <li>• Restraints</li> <li>• SCD order</li> <li>• Sepsis trigger order</li> <li>• Soft tissue US</li> <li>• Speech swallow test</li> <li>• Spine MR</li> <li>• Spine US</li> <li>• TEE</li> <li>• Telemetry</li> <li>• TTE</li> <li>• Turn patient order</li> <li>• Umbilical line placement</li> <li>• Urine culture</li> <li>• Venous US</li> <li>• Ventilation order</li> <li>• Wound care</li> <li>• Wound VAC</li> <li>• 1:1 Order (Sitter)</li> </ul> |                                                                                                                                                                                                |
| <b>Continuous laboratory variables (n=27)</b>                                                                                                                                                                                                                                                                                                                                                                                                                                                                                                                          |                                                                                                                                                                                                                                                                                                                                                                                                                                                                                                                                                                                                             |                                                                                                                                                                                                                                                                                                                                                                                                                                                                                                                                                                                                                  |                                                                                                                                                                                                                                                                                                                                                                                                                                                                                                                                         |                                                                                                                                                                                                |
| <ul style="list-style-type: none"> <li>• Absolute lymphocyte count</li> <li>• Anion gap</li> <li>• Bicarbonate</li> <li>• BUN</li> <li>• BUN/creatinine ratio</li> <li>• Calcium</li> <li>• Carbon dioxide</li> </ul>                                                                                                                                                                                                                                                                                                                                                  | <ul style="list-style-type: none"> <li>• Chloride</li> <li>• Creatinine</li> <li>• eGFR</li> <li>• Eosinophils</li> <li>• Glucose</li> <li>• Hematocrit</li> <li>• Hemoglobin</li> </ul>                                                                                                                                                                                                                                                                                                                                                                                                                    | <ul style="list-style-type: none"> <li>• Lymphocytes</li> <li>• MCHC</li> <li>• MCV</li> <li>• Monocytes</li> <li>• MPV</li> <li>• Neutrophils</li> <li>• Platelet count</li> </ul>                                                                                                                                                                                                                                                                                                                                                                                                                              | <ul style="list-style-type: none"> <li>• Potassium</li> <li>• RBC count</li> <li>• RDW</li> <li>• Sodium</li> <li>• WBC count</li> <li>• Δ Creat 48</li> </ul>                                                                                                                                                                                                                                                                                                                                                                          |                                                                                                                                                                                                |
| <b>Medication groups variables (n=34)</b>                                                                                                                                                                                                                                                                                                                                                                                                                                                                                                                              |                                                                                                                                                                                                                                                                                                                                                                                                                                                                                                                                                                                                             |                                                                                                                                                                                                                                                                                                                                                                                                                                                                                                                                                                                                                  |                                                                                                                                                                                                                                                                                                                                                                                                                                                                                                                                         |                                                                                                                                                                                                |
| <ul style="list-style-type: none"> <li>• ACEi/ARB</li> <li>• ACEi</li> <li>• Aminoglycosides</li> <li>• Antibiotics</li> <li>• Antidepressants</li> <li>• Antifungals</li> <li>• ARB</li> </ul>                                                                                                                                                                                                                                                                                                                                                                        | <ul style="list-style-type: none"> <li>• Anti-thymocyte globulin</li> <li>• Breast milk</li> <li>• β-blockers</li> <li>• β-lactam antibiotics</li> <li>• Calcium channel blockers</li> <li>• Chemotherapy</li> </ul>                                                                                                                                                                                                                                                                                                                                                                                        | <ul style="list-style-type: none"> <li>• CMV immunoglobulin</li> <li>• Diuretics</li> <li>• Fluoroquinolones</li> <li>• HAART</li> <li>• Immune globulin</li> <li>• Immunomodulators</li> <li>• Insulins</li> <li>• Iodine contrasts</li> </ul>                                                                                                                                                                                                                                                                                                                                                                  | <ul style="list-style-type: none"> <li>• Potassium-sparing diuretics</li> <li>• Loop diuretics</li> <li>• Narcotics</li> <li>• NSAIDs</li> <li>• Pancreatic enzymes</li> <li>• Paralytic agents</li> <li>• PPIs</li> </ul>                                                                                                                                                                                                                                                                                                              | <ul style="list-style-type: none"> <li>• Vasopressors</li> <li>• Sedatives</li> <li>• Statins</li> <li>• Steroids</li> <li>• Thiazide diuretics</li> <li>• Total parental nutrition</li> </ul> |

**Continued Supplemental Table 1.** Predictor variables used to create parsimonious prediction models.

| <b>Categorical laboratory variables (n=222)</b>                                                                                                                                                                                                                                                                                                                                                                                                                                                                                                                                                                                                                                                                                                                                                                                                                                                                                                                                                                                                                                                                                                                                     |                                                                                                                                                                                                                                                                                                                                                                                                                                                                                                                                                                                                                                                                                                                                                                                                                                                                                                                                                                                                                                                                                                                                                                                                                          |                                                                                                                                                                                                                                                                                                                                                                                                                                                                                                                                                                                                                                                                                                                                                                                                                                                                                                                                                                                                                                                                                                                                   |                                                                                                                                                                                                                                                                                                                                                                                                                                                                                                                                                                                                                                                                                                                                                                                                                                                                                                                                                                                                                                                                                                                                               |                                                                                                                                                                                                                                                                                                                                                                                                                                                                                                                                                                                                                                                                                                                                                                                                                                                                                                                                                                                                                                                                                                                                                                                                                                                                                                         |
|-------------------------------------------------------------------------------------------------------------------------------------------------------------------------------------------------------------------------------------------------------------------------------------------------------------------------------------------------------------------------------------------------------------------------------------------------------------------------------------------------------------------------------------------------------------------------------------------------------------------------------------------------------------------------------------------------------------------------------------------------------------------------------------------------------------------------------------------------------------------------------------------------------------------------------------------------------------------------------------------------------------------------------------------------------------------------------------------------------------------------------------------------------------------------------------|--------------------------------------------------------------------------------------------------------------------------------------------------------------------------------------------------------------------------------------------------------------------------------------------------------------------------------------------------------------------------------------------------------------------------------------------------------------------------------------------------------------------------------------------------------------------------------------------------------------------------------------------------------------------------------------------------------------------------------------------------------------------------------------------------------------------------------------------------------------------------------------------------------------------------------------------------------------------------------------------------------------------------------------------------------------------------------------------------------------------------------------------------------------------------------------------------------------------------|-----------------------------------------------------------------------------------------------------------------------------------------------------------------------------------------------------------------------------------------------------------------------------------------------------------------------------------------------------------------------------------------------------------------------------------------------------------------------------------------------------------------------------------------------------------------------------------------------------------------------------------------------------------------------------------------------------------------------------------------------------------------------------------------------------------------------------------------------------------------------------------------------------------------------------------------------------------------------------------------------------------------------------------------------------------------------------------------------------------------------------------|-----------------------------------------------------------------------------------------------------------------------------------------------------------------------------------------------------------------------------------------------------------------------------------------------------------------------------------------------------------------------------------------------------------------------------------------------------------------------------------------------------------------------------------------------------------------------------------------------------------------------------------------------------------------------------------------------------------------------------------------------------------------------------------------------------------------------------------------------------------------------------------------------------------------------------------------------------------------------------------------------------------------------------------------------------------------------------------------------------------------------------------------------|---------------------------------------------------------------------------------------------------------------------------------------------------------------------------------------------------------------------------------------------------------------------------------------------------------------------------------------------------------------------------------------------------------------------------------------------------------------------------------------------------------------------------------------------------------------------------------------------------------------------------------------------------------------------------------------------------------------------------------------------------------------------------------------------------------------------------------------------------------------------------------------------------------------------------------------------------------------------------------------------------------------------------------------------------------------------------------------------------------------------------------------------------------------------------------------------------------------------------------------------------------------------------------------------------------|
| <ul style="list-style-type: none"> <li>• 1,25 vitamin D</li> <li>• 25, vitamin-D2</li> <li>• ABO group</li> <li>• Acetaminophen</li> <li>• Acetylcholine Ab</li> <li>• Activated Coagulation Time</li> <li>• Adrenocorticotrophic hormone</li> <li>• ADAMTS13</li> <li>• Adenovirus DFA</li> <li>• Adenovirus PCR</li> <li>• Adenovirus quantitative</li> <li>• AFP</li> <li>• Albumin</li> <li>• Aldolase</li> <li>• Alkaline phosphatase</li> <li>• Alpha 1 antitrypsin</li> <li>• ALT</li> <li>• Amikacin</li> <li>• Ammonia</li> <li>• amylase</li> <li>• ANA</li> <li>• ANA pattern</li> <li>• ANCA screen</li> <li>• Anticardiolipin</li> <li>• Anti-glial nuclear Ab</li> <li>• Arterial HCO3</li> <li>• Arterial pCO</li> <li>• Arterial pCO2</li> <li>• Arterial pO2</li> <li>• ASO titer</li> <li>• AST/ALT ratio</li> <li>• Atypical lymphocytes</li> <li>• Atypical P-ANCA</li> <li>• Autopsy</li> <li>• Babesia Ab</li> <li>• Babesia PCR</li> <li>• Bands</li> <li>• Bartonella Ab</li> <li>• Base excess</li> <li>• Basophilic stippling</li> <li>• BK PCR</li> <li>• BK quantitative</li> <li>• Blasts</li> <li>• Blood culture</li> <li>• Blood ketones</li> </ul> | <ul style="list-style-type: none"> <li>• Blood smear</li> <li>• Carbamazepine</li> <li>• Brain natriuretic peptide</li> <li>• Bone marrow aspiration</li> <li>• Brucella Ab</li> <li>• C-peptide</li> <li>• C3 complement</li> <li>• C4 complement</li> <li>• Caffeine</li> <li>• Carboxyhemoglobin</li> <li>• Carnitine</li> <li>• Catheter culture</li> <li>• Complete blood count</li> <li>• CD-19 lymphocytes</li> <li>• CD-20 lymphocytes</li> <li>• CD-21 lymphocytes</li> <li>• CD-22 lymphocytes</li> <li>• Celiac disease screen</li> <li>• Chlamydia DNA</li> <li>• Cholesterol</li> <li>• Chromosomal analysis</li> <li>• C. difficile Ag</li> <li>• C. difficile PCR</li> <li>• C. difficile toxin</li> <li>• CK-MB</li> <li>• CMV Ab</li> <li>• CMV quantitative</li> <li>• CMV PCR</li> <li>• Copper</li> <li>• Cortisol</li> <li>• Coxackie-B Ab</li> <li>• C-reactive protein</li> <li>• Creatine kinase</li> <li>• CSF albumin</li> <li>• CSF culture</li> <li>• Cyclosporine</li> <li>• D-dimer</li> <li>• Direct bilirubin</li> <li>• Direct fluorescent Ab</li> <li>• DNase</li> <li>• Double stranded DNA</li> <li>• E.Coli shiga toxin assay</li> <li>• Hep-B core Ab</li> <li>• EBV Ag</li> </ul> | <ul style="list-style-type: none"> <li>• EBV PCR</li> <li>• EKG heart rate</li> <li>• EKG QRS</li> <li>• EKG QRS axis</li> <li>• EKG R axis</li> <li>• Erythrocyte sedimentation rate</li> <li>• Ethanol</li> <li>• Ferritin</li> <li>• Fibrinogen</li> <li>• FIO2</li> <li>• Flow cytometry</li> <li>• Gentamicin peak</li> <li>• Gentamicin trough</li> <li>• Gamma glutamyl transferase</li> <li>• GMB Ab</li> <li>• Haptoglobin</li> <li>• HbA1C</li> <li>• HDL</li> <li>• Heparin induced Ab</li> <li>• Hep-B E Ag</li> <li>• Hep-B quantitative</li> <li>• Hep-B surface Ab</li> <li>• Hep-B surface Ag</li> <li>• Hep-C Ab</li> <li>• Hep-C genotype</li> <li>• Hep-C quantitative</li> <li>• High sensitivity CRP</li> <li>• HIV Ab</li> <li>• HIV-1 Ab</li> <li>• HIV-1 RNA</li> <li>• HIV-2 Ab</li> <li>• Immature granulocytes</li> <li>• Influenza Ag</li> <li>• Influenza A Ab</li> <li>• Influenza A PCR</li> <li>• Influenza B Ab</li> <li>• Influenza PCR</li> <li>• INR</li> <li>• Intact PTH</li> <li>• Ionized calcium</li> <li>• Iron</li> <li>• Lactate</li> <li>• Lead</li> <li>• Leukemia panel</li> </ul> | <ul style="list-style-type: none"> <li>• LDH</li> <li>• Lipase</li> <li>• Lithium</li> <li>• Lyme Ab</li> <li>• Random urine creatinine</li> <li>• Magnesium</li> <li>• MCH</li> <li>• Methemoglobin</li> <li>• Mixed venous CO2</li> <li>• Mixed venous pH</li> <li>• MRSA</li> <li>• Nucleated RBC</li> <li>• Osmolality</li> <li>• Oxygen saturation</li> <li>• pCO2</li> <li>• P-ANCA</li> <li>• Pertussis Ab</li> <li>• pH</li> <li>• Phosphorous</li> <li>• Plasma amino acid</li> <li>• Plasma hemoglobin</li> <li>• Plasma metanephrines</li> <li>• pO2</li> <li>• Prealbumin</li> <li>• Procalcitonin</li> <li>• PTH</li> <li>• Qualitative CMV</li> <li>• Random urine calcium</li> <li>• Rapamycin</li> <li>• RBC morphology</li> <li>• RDW</li> <li>• Relative eosinophils</li> <li>• Relative lymphocytes</li> <li>• Relative neutrophils</li> <li>• Renin</li> <li>• Reticulocytes</li> <li>• Rheumatoid factors</li> <li>• Salisylate</li> <li>• Serine protease 3</li> <li>• Stool PCR</li> <li>• Tacrolimus</li> <li>• Tuberculosis test</li> <li>• Thrombin time</li> <li>• Thyroxine</li> <li>• Total bilirubin</li> </ul> | <ul style="list-style-type: none"> <li>• Total complement</li> <li>• Total creatine kinase</li> <li>• Total protein</li> <li>• Triglycerides</li> <li>• Troponin</li> <li>• TSH</li> <li>• Type/screen</li> <li>• UA appearance</li> <li>• UA bacteria</li> <li>• UA glucose</li> <li>• UA leukocyte esterase</li> <li>• Urine albumin/creatinine</li> <li>• Urea/nitrogen in urine</li> <li>• Urinalysis</li> <li>• Urine bacteria</li> <li>• Urine barbiturate</li> <li>• Urine <math>\beta</math>-2 microglobulin</li> <li>• Urine BK</li> <li>• Urine calcium</li> <li>• Urine calcium oxalate</li> <li>• Urine calcium pyrophosphate</li> <li>• Urine chloride</li> <li>• Urine creatinine</li> <li>• Urine culture</li> <li>• Urine eosinophils</li> <li>• Urine fine casts</li> <li>• Urine glucose</li> <li>• Urine gram stain</li> <li>• Urine granular casts</li> <li>• Urine hyaline casts</li> <li>• Urine norepinephrine</li> <li>• Urine organic acids</li> <li>• Urine osmolality</li> <li>• Urine phosphate</li> <li>• Urine potassium</li> <li>• Urine RBC</li> <li>• Urine sodium</li> <li>• Urine uric acid</li> <li>• Urine waxy casts</li> <li>• Urine WBC cast</li> <li>• Valproate</li> <li>• Vancomycin trough</li> <li>• Venous O2 saturation</li> <li>• Venous pO2</li> </ul> |

**Continued Supplemental Table 1.** Predictor variables used to create parsimonious prediction models.

| <b>Individual medications variables (n=315)</b>                                                                                                                                                                                                                                                                                                                                                                                                                                                                                                                                                                                                                                                                                                                                                                                                                                                                                                                                                                                                                                                                                                                                                                                                                  |                                                                                                                                                                                                                                                                                                                                                                                                                                                                                                                                                                                                                                                                                                                                                                                                                                                                                                                                                                                                                                                                                                                                                                                                                                                      |                                                                                                                                                                                                                                                                                                                                                                                                                                                                                                                                                                                                                                                                                                                                                                                                                                                                                                                                                                                                                                                                                                                                                                                                                                                                    |                                                                                                                                                                                                                                                                                                                                                                                                                                                                                                                                                                                                                                                                                                                                                                                                                                                                                                                                                                                                                                                                                                                                                                                                      |                                                                                                                                                                                                                                                                                                                                                                                                                                                                                                                                                                                                                                                                                                                                                                                                                                                                                                                                                                                                                                                                                                                                                                                                                |
|------------------------------------------------------------------------------------------------------------------------------------------------------------------------------------------------------------------------------------------------------------------------------------------------------------------------------------------------------------------------------------------------------------------------------------------------------------------------------------------------------------------------------------------------------------------------------------------------------------------------------------------------------------------------------------------------------------------------------------------------------------------------------------------------------------------------------------------------------------------------------------------------------------------------------------------------------------------------------------------------------------------------------------------------------------------------------------------------------------------------------------------------------------------------------------------------------------------------------------------------------------------|------------------------------------------------------------------------------------------------------------------------------------------------------------------------------------------------------------------------------------------------------------------------------------------------------------------------------------------------------------------------------------------------------------------------------------------------------------------------------------------------------------------------------------------------------------------------------------------------------------------------------------------------------------------------------------------------------------------------------------------------------------------------------------------------------------------------------------------------------------------------------------------------------------------------------------------------------------------------------------------------------------------------------------------------------------------------------------------------------------------------------------------------------------------------------------------------------------------------------------------------------|--------------------------------------------------------------------------------------------------------------------------------------------------------------------------------------------------------------------------------------------------------------------------------------------------------------------------------------------------------------------------------------------------------------------------------------------------------------------------------------------------------------------------------------------------------------------------------------------------------------------------------------------------------------------------------------------------------------------------------------------------------------------------------------------------------------------------------------------------------------------------------------------------------------------------------------------------------------------------------------------------------------------------------------------------------------------------------------------------------------------------------------------------------------------------------------------------------------------------------------------------------------------|------------------------------------------------------------------------------------------------------------------------------------------------------------------------------------------------------------------------------------------------------------------------------------------------------------------------------------------------------------------------------------------------------------------------------------------------------------------------------------------------------------------------------------------------------------------------------------------------------------------------------------------------------------------------------------------------------------------------------------------------------------------------------------------------------------------------------------------------------------------------------------------------------------------------------------------------------------------------------------------------------------------------------------------------------------------------------------------------------------------------------------------------------------------------------------------------------|----------------------------------------------------------------------------------------------------------------------------------------------------------------------------------------------------------------------------------------------------------------------------------------------------------------------------------------------------------------------------------------------------------------------------------------------------------------------------------------------------------------------------------------------------------------------------------------------------------------------------------------------------------------------------------------------------------------------------------------------------------------------------------------------------------------------------------------------------------------------------------------------------------------------------------------------------------------------------------------------------------------------------------------------------------------------------------------------------------------------------------------------------------------------------------------------------------------|
| <ul style="list-style-type: none"> <li>• Acetaminophen</li> <li>• Acetazolamide</li> <li>• Acetylcysteine</li> <li>• Acyclovir</li> <li>• Adalimumab</li> <li>• Adenosine</li> <li>• Albumin</li> <li>• Albuterol</li> <li>• Aldesleukin</li> <li>• Alemtuzumab</li> <li>• Allopurinol</li> <li>• Alprazolam</li> <li>• Alprostadil</li> <li>• Alteplase</li> <li>• Amantadine</li> <li>• Ambisome</li> <li>• Amikacin</li> <li>• Amiodarone</li> <li>• Amitriptyline</li> <li>• Amlodipine</li> <li>• Amoxicillin</li> <li>• Amoxicillin / clavulanate</li> <li>• Amphotericin</li> <li>• Ampicillin</li> <li>• Ampicillin / sulbactam</li> <li>• Anakinra</li> <li>• Anidulafungin</li> <li>• Aripiprazole</li> <li>• Asparaginase</li> <li>• Aspirin</li> <li>• Atenolol</li> <li>• Atorvastatin</li> <li>• Atovaquone</li> <li>• Atropine</li> <li>• Azathioprine</li> <li>• Azithromycin</li> <li>• Aztreonam</li> <li>• Baclofen</li> <li>• Barium</li> <li>• Basiliximab</li> <li>• Bleomycin</li> <li>• Budesonide</li> <li>• Bumetanide</li> <li>• Bupropion</li> <li>• Busulfan</li> <li>• Caffeine</li> <li>• Calcitriol</li> <li>• Calcium carbonate</li> <li>• Calcium chloride</li> <li>• Calcium citrate</li> <li>• Calcium glubionate</li> </ul> | <ul style="list-style-type: none"> <li>• Calcium gluconate</li> <li>• Captopril</li> <li>• Carbamazepine</li> <li>• Carboplatin</li> <li>• Carvedilol</li> <li>• Cefazolin</li> <li>• Cefdinir</li> <li>• Cefotaxime</li> <li>• Ceftazidime</li> <li>• Ceftriaxone</li> <li>• Cefuroxime</li> <li>• Celecoxib</li> <li>• Cephalixin</li> <li>• Certolizumab</li> <li>• Charcoal</li> <li>• Chlorpromazine</li> <li>• Ciprofloxacin</li> <li>• Cisatracurium</li> <li>• Cisplatin</li> <li>• Citalopram</li> <li>• Cladribin</li> <li>• Clarithromycin</li> <li>• Clindamycin</li> <li>• Clobazam</li> <li>• Clofarabin</li> <li>• Clonazepam</li> <li>• Clonidine</li> <li>• Clopidogrel</li> <li>• Codeine</li> <li>• Corticotropin</li> <li>• Cosyntropin</li> <li>• Creatine</li> <li>• Cyclophosphamide</li> <li>• Cyclosporine</li> <li>• Cyproheptadine</li> <li>• Cytarabine</li> <li>• Dactinomycin</li> <li>• Daptomycin</li> <li>• Daunorubicin</li> <li>• Decitabin</li> <li>• Deferasirox</li> <li>• Desmopressin</li> <li>• Dexamethasone</li> <li>• Dexmedetomidine</li> <li>• Dextrose drip</li> <li>• Diatrizoate</li> <li>• Diazepam</li> <li>• Diazoxide</li> <li>• Digoxin</li> <li>• Diltiazem</li> <li>• Dinutuximab</li> </ul> | <ul style="list-style-type: none"> <li>• Diphenhydramine</li> <li>• Dobutamine</li> <li>• Docusate</li> <li>• Dolutegravir</li> <li>• Dopamine</li> <li>• Dornase alpha</li> <li>• Doxazosin</li> <li>• Doxorubicin</li> <li>• Doxycycline</li> <li>• Dronabinol</li> <li>• Duloxetine</li> <li>• Eculizumab</li> <li>• Enalapril</li> <li>• Enoxaparin</li> <li>• Entecavir</li> <li>• Epinephrine</li> <li>• Epoetin alpha</li> <li>• Ertapenem</li> <li>• Erythromycin</li> <li>• Esmolol</li> <li>• Ethosuximide</li> <li>• Etoposide</li> <li>• Ezetimibe</li> <li>• Famotidine</li> <li>• Fentanyl</li> <li>• Ferrous sulfate</li> <li>• Ferrous sucrose</li> <li>• Filgrastim</li> <li>• Fluconazole</li> <li>• Fludarabine</li> <li>• Fludrocortisone</li> <li>• Fluorouracil</li> <li>• Fluoxetine</li> <li>• Foscarnet</li> <li>• Furosemide</li> <li>• Gabapentin</li> <li>• Ganciclovir</li> <li>• Gemcitabine</li> <li>• Gentamicin</li> <li>• Glucagon</li> <li>• Granisetron</li> <li>• Haloperidol</li> <li>• Heparin</li> <li>• Hydrochlorothiazide</li> <li>• Hydralazine</li> <li>• Hydrocodone</li> <li>• Hydrocortisone</li> <li>• Hydromorphone</li> <li>• Hydroxychloroquine</li> <li>• Hydroxyurea</li> <li>• Hypertonic saline</li> </ul> | <ul style="list-style-type: none"> <li>• Ibuprofen</li> <li>• Ifosfamide</li> <li>• Indomethacin</li> <li>• Iodixanol</li> <li>• Infliximab</li> <li>• Interferon alpha</li> <li>• Iohexol</li> <li>• Iopamidol</li> <li>• Ipratropium</li> <li>• Irinotecan</li> <li>• Isoniazid</li> <li>• Isradipine</li> <li>• Levetiracetam</li> <li>• Ketamine</li> <li>• Ketorolac</li> <li>• Labetalol</li> <li>• Lactulose</li> <li>• Lamotrigine</li> <li>• Lansoprazole</li> <li>• Leucovorin</li> <li>• Levocarnitine</li> <li>• Levofloxacin</li> <li>• Levothyroxine</li> <li>• Lidocaine</li> <li>• Lisinopril</li> <li>• Lithium</li> <li>• Loperamide</li> <li>• Lorazepam</li> <li>• Losartan</li> <li>• Magic mouthwash</li> <li>• Magnesium</li> <li>• Mannitol</li> <li>• Meclizine</li> <li>• Melatonin</li> <li>• Meperidine</li> <li>• Mercaptopurine</li> <li>• Meropenem</li> <li>• Mesalamine</li> <li>• Mesna</li> <li>• Metformin</li> <li>• Methadone</li> <li>• Methimazole</li> <li>• Methotrexate</li> <li>• Methylprednisolone</li> <li>• Metoclopramide</li> <li>• Metolazone</li> <li>• Metoprolol</li> <li>• Metronidazole</li> <li>• Midazolam</li> <li>• Midodrine</li> </ul> | <ul style="list-style-type: none"> <li>• Milrinone</li> <li>• Mirtazapine</li> <li>• Misoprostol</li> <li>• Mitoxantrone</li> <li>• Morphine</li> <li>• Moxifloxacin</li> <li>• Mycophenolate</li> <li>• Nadolol</li> <li>• Nafcillin</li> <li>• Naloxone</li> <li>• Naproxen</li> <li>• Neomycin</li> <li>• Nicardipine</li> <li>• Nifedipine</li> <li>• Nimodipine</li> <li>• Nitrofurantoin</li> <li>• Nitroprusside</li> <li>• Norepinephrine</li> <li>• Nortriptyline</li> <li>• Nystatin</li> <li>• Octreotide</li> <li>• Olanzapine</li> <li>• Omeprazole</li> <li>• Ondansetron</li> <li>• Oseltamivir</li> <li>• Oxacillin</li> <li>• Oxcarbazepine</li> <li>• Oxybutynin</li> <li>• Oxycodone</li> <li>• Paclitaxel</li> <li>• Palivizumab</li> <li>• Pantoprazole</li> <li>• Paroxetine</li> <li>• Pegaspargase</li> <li>• Penicillin</li> <li>• Pentamidine</li> <li>• Pentobarbital</li> <li>• Perphenazine</li> <li>• Phenazopyridine</li> <li>• Phenobarbital</li> <li>• Phenylephrine</li> <li>• Phenytoin</li> <li>• Piperacillin / tazobactam</li> <li>• Posaconazole</li> <li>• Potassium</li> <li>• Pravastatin</li> <li>• Prazosin</li> <li>• Prednisone</li> <li>• Pregabalin</li> </ul> |

**Continued Supplemental Table 1.** Predictor variables used to create parsimonious prediction models.

| <b>Individual medications variables (n=315)</b>                                                                                                                                                                                                                                                                                                                                                                                                                                                                                                                                                                                                                                                                                                                                                                                                                                                                                                                                                                                                                                                                                                                                                                                                                                                                                                                                                                                                                                                                                                                                                                                                                                                                                                                                                                                                                                                                                                                                                                                                                                                                                                                                                                                                                                                                                                                                                   |                                                                                                                                                                                                                                                                                                                                                                                                                                                    |                                                                                                                                                                                                                                                                                                                                                                                                             |                                                                                                                                                                                                                                                                                                                                                                                                 |
|---------------------------------------------------------------------------------------------------------------------------------------------------------------------------------------------------------------------------------------------------------------------------------------------------------------------------------------------------------------------------------------------------------------------------------------------------------------------------------------------------------------------------------------------------------------------------------------------------------------------------------------------------------------------------------------------------------------------------------------------------------------------------------------------------------------------------------------------------------------------------------------------------------------------------------------------------------------------------------------------------------------------------------------------------------------------------------------------------------------------------------------------------------------------------------------------------------------------------------------------------------------------------------------------------------------------------------------------------------------------------------------------------------------------------------------------------------------------------------------------------------------------------------------------------------------------------------------------------------------------------------------------------------------------------------------------------------------------------------------------------------------------------------------------------------------------------------------------------------------------------------------------------------------------------------------------------------------------------------------------------------------------------------------------------------------------------------------------------------------------------------------------------------------------------------------------------------------------------------------------------------------------------------------------------------------------------------------------------------------------------------------------------|----------------------------------------------------------------------------------------------------------------------------------------------------------------------------------------------------------------------------------------------------------------------------------------------------------------------------------------------------------------------------------------------------------------------------------------------------|-------------------------------------------------------------------------------------------------------------------------------------------------------------------------------------------------------------------------------------------------------------------------------------------------------------------------------------------------------------------------------------------------------------|-------------------------------------------------------------------------------------------------------------------------------------------------------------------------------------------------------------------------------------------------------------------------------------------------------------------------------------------------------------------------------------------------|
| <ul style="list-style-type: none"> <li>• Prochlorperazine</li> <li>• Propofol</li> <li>• Propranolol</li> <li>• Prostaglandin</li> <li>• Protamine</li> <li>• Pseudoephedrine</li> <li>• Pyridoxine</li> <li>• Quetiapine</li> <li>• Raltegravir</li> <li>• Ranitidine</li> <li>• Rasburicase</li> <li>• Rifampin</li> <li>• Rifaximin</li> <li>• Ringer lactate bolus</li> <li>• Ringer lactate drip</li> <li>• Risperidone</li> </ul>                                                                                                                                                                                                                                                                                                                                                                                                                                                                                                                                                                                                                                                                                                                                                                                                                                                                                                                                                                                                                                                                                                                                                                                                                                                                                                                                                                                                                                                                                                                                                                                                                                                                                                                                                                                                                                                                                                                                                           | <ul style="list-style-type: none"> <li>• Rituximab</li> <li>• Saline bolus</li> <li>• Saline drip</li> <li>• Sertraline</li> <li>• Sevelamer</li> <li>• Sildenafil</li> <li>• Simethicone</li> <li>• Sirolimus</li> <li>• Sodium acetate</li> <li>• Sodium bicarbonate</li> <li>• Sodium citrate</li> <li>• Sotalol</li> <li>• Spironolactone</li> <li>• Sulfamethoxazole / trimethoprim</li> <li>• Sulfasalazine</li> <li>• Tacrolimus</li> </ul> | <ul style="list-style-type: none"> <li>• Tamsulosin</li> <li>• Technetium</li> <li>• Temozolomide</li> <li>• Tenofovir</li> <li>• Terazosin</li> <li>• Terbutaline</li> <li>• Theophylline</li> <li>• Thymoglobulin</li> <li>• Tobramycin</li> <li>• Topiramate</li> <li>• Topotecan</li> <li>• Torsemide</li> <li>• Tramadol</li> <li>• Trazodone</li> <li>• Valganciclovir</li> <li>• Valproic</li> </ul> | <ul style="list-style-type: none"> <li>• Vancomycin</li> <li>• Vasopressin</li> <li>• Venlafaxine</li> <li>• Verapamil</li> <li>• Vinblastine</li> <li>• Vincristine</li> <li>• Vitamin C</li> <li>• Vitamin D</li> <li>• Vitamin K</li> <li>• Voriconazole</li> <li>• Warfarin</li> <li>• Ziprasidone</li> <li>• Zoledronic acid</li> <li>• Zolpidem</li> <li>• Zonisamide</li> </ul>          |
| <b>Variables excluded from analysis due to high collinearity</b>                                                                                                                                                                                                                                                                                                                                                                                                                                                                                                                                                                                                                                                                                                                                                                                                                                                                                                                                                                                                                                                                                                                                                                                                                                                                                                                                                                                                                                                                                                                                                                                                                                                                                                                                                                                                                                                                                                                                                                                                                                                                                                                                                                                                                                                                                                                                  |                                                                                                                                                                                                                                                                                                                                                                                                                                                    |                                                                                                                                                                                                                                                                                                                                                                                                             |                                                                                                                                                                                                                                                                                                                                                                                                 |
| <ul style="list-style-type: none"> <li>• 25, vitamin-D3</li> <li>• A/G ratio</li> <li>• Absolute neutrophil count</li> <li>• Absolute nucleated RBC</li> <li>• Aldosterone</li> <li>• ANA titer</li> <li>• Arterial bicarbonate</li> <li>• Arterial pH</li> <li>• AST</li> <li>• Basophils</li> <li>• Basophils percent</li> <li>• C. difficile enzyme immunoassay</li> <li>• C-ANCA</li> </ul>                                                                                                                                                                                                                                                                                                                                                                                                                                                                                                                                                                                                                                                                                                                                                                                                                                                                                                                                                                                                                                                                                                                                                                                                                                                                                                                                                                                                                                                                                                                                                                                                                                                                                                                                                                                                                                                                                                                                                                                                   | <ul style="list-style-type: none"> <li>• Catecholamines</li> <li>• CD-23 lymphocytes</li> <li>• EKG P wave</li> <li>• EKG PR interval</li> <li>• EKG PR interval</li> <li>• EKG qrs interval</li> <li>• Globulin</li> <li>• HIV-2 RNA</li> <li>• Influenza B PCR</li> <li>• Influenza DFA</li> <li>• Iron saturation</li> <li>• LDL</li> <li>• Mixed venous O2</li> <li>• Oxygen saturation</li> </ul>                                             | <ul style="list-style-type: none"> <li>• Prothrombin time</li> <li>• PTT</li> <li>• RH type</li> <li>• TIBC</li> <li>• UA blood</li> <li>• UA nitrite</li> <li>• UA pH</li> <li>• UA protein</li> <li>• UA specific gravity</li> <li>• Urine albumin</li> <li>• Urine benzodiazepine</li> <li>• Urine bilirubin</li> <li>• Urine clarity</li> <li>• Urine cocaine</li> </ul>                                | <ul style="list-style-type: none"> <li>• Urine color</li> <li>• Urine epinephrine</li> <li>• Urine ketones</li> <li>• Urine pH</li> <li>• Urine phencyclidine</li> <li>• Urine protein/creatinine ratio</li> <li>• Urine uric acid</li> <li>• Urine WBC</li> <li>• Vancomycin random</li> <li>• Venous bicarbonate</li> <li>• Venous pCO</li> <li>• Venous pCO2</li> <li>• Venous pH</li> </ul> |
| <p><sup>a</sup> log transformed as time since admission (log (time since admission+1)). Ab, antibody; ACEi, angiotensin-converting enzyme inhibitor; Ag, antigen; A/G, albumin/globulin; ALT, alanine aminotransferase; ANA, antinuclear antibody; ANCA, antineutrophil cytoplasmic antibodies, ARB, angiotensin receptor blocker; ASO, antistreptolysin O; AST, aspartate aminotransferase; BiPAP, bilevel positive airway pressure; BUN, Blood urea nitrogen; CK-MB, creatine kinase-muscle/brain; CMV, cytomegalovirus; CPAP, continuous positive airway pressure; CSF, Cerebrospinal fluid; CT, computerized tomography; CTICU, Cardiothoracic Intensive Care Unit; DART, detection assessment research &amp; treatment; HDL, high-density lipoproteins; DFA, direct fluorescent antibody; EBV, Epstein-Barr virus; EEG, electroencephalogram; eGFR, estimated glomerular filtration rate; EKG, electrocardiogram; ETT, endotracheal tube; FiO2, fraction of inspired oxygen; GBM, glomerular basement membrane; HAART, highly active antiretroviral therapy; HFOV, high frequency oscillatory ventilation; INR, international normalized ratio; IR, interventional radiology; LDH, lactate dehydrogenase; LDL, low-density lipoproteins; MCH, mean corpuscular hemoglobin; MCHC, mean corpuscular hemoglobin; MCV, mean corpuscular volume; MPV, mean platelet volume; MR, magnetic resonance imaging; MRSA, Methicillin-resistant Staphylococcus aureus; NICU, neonatal intensive care unit; NIPPV, noninvasive positive-pressure ventilation; NPO, nil per os; NSAID, nonsteroidal anti-inflammatory drugs; PACU, post-anesthesia care unit; pCO, partial pressure of carbon monoxide; pCO2, partial pressure of carbon dioxide; PCR, polymerase chain reaction; PICU, pediatric intensive care unit; pO2, partial pressure of oxygen; PPI, proton-pump inhibitors; PT, physical therapy; PTH, parathyroid hormone; PTT, partial thromboplastin time; SICU, surgical intensive care unit; RBC, red blood cells; RDW, red cell distribution width; SCD, sequential compression device; TEE, transesophageal echocardiography; TIBC, total iron binding capacity; TSH, thyroid stimulating hormone; TTE, transthoracic echocardiogram; UA, urinalysis; US, ultrasound; VAC, negative-pressure wound therapy; XR, x-ray; Δ Creat 48, Change in serum creatinine within the last 48 hours.</p> |                                                                                                                                                                                                                                                                                                                                                                                                                                                    |                                                                                                                                                                                                                                                                                                                                                                                                             |                                                                                                                                                                                                                                                                                                                                                                                                 |

**Supplemental Table 2.** Comparing demographic and clinical characteristics according to development of AKI in the derivation cohort.

| Variables                                                                                                                                                                                                                                  | AKI (N=516)       | Non-AKI (N=4556)   | p-value |
|--------------------------------------------------------------------------------------------------------------------------------------------------------------------------------------------------------------------------------------------|-------------------|--------------------|---------|
| <b>Demographic</b>                                                                                                                                                                                                                         |                   |                    |         |
| Age, yr (range)                                                                                                                                                                                                                            | 2.9 (0,13.3)      | 5.4 (0.2,13.6)     | <0.01   |
| Ethnicity (Hispanic), n (%)                                                                                                                                                                                                                | 135 (26.2%)       | 1212 (26.6%)       | 0.85    |
| Race (black), n (%)                                                                                                                                                                                                                        | 126 (24.4%)       | 922 (20.2%)        | 0.05    |
| Sex (Male), n (%)                                                                                                                                                                                                                          | 289 (56%)         | 2467 (54.1%)       | 0.47    |
| <b>Medical History</b>                                                                                                                                                                                                                     |                   |                    |         |
| Congenital heart disease                                                                                                                                                                                                                   | 149 (28.9%)       | 525 (11.5%)        | <0.01   |
| CKD                                                                                                                                                                                                                                        | 24 (4.7%)         | 53 (1.2%)          | <0.01   |
| Malignancy                                                                                                                                                                                                                                 | 105 (20.3%)       | 736 (16.2%)        | 0.05    |
| <b>Inpatient location, n (%)</b>                                                                                                                                                                                                           |                   |                    |         |
| Pediatric ICU                                                                                                                                                                                                                              | 90 (17.4%)        | 668 (14.7%)        | 0.09    |
| Neonatal ICU                                                                                                                                                                                                                               | 169 (32.8%)       | 649 (14.2%)        | <0.01   |
| General pediatrics                                                                                                                                                                                                                         | 62 (12%)          | 1226 (26.9%)       | <0.01   |
| Pediatric Surgery                                                                                                                                                                                                                          | 39 (7.6%)         | 479 (10.5%)        | 0.04    |
| Hematology/Oncology                                                                                                                                                                                                                        | 78 (15.1%)        | 615 (13.5%)        | 0.37    |
| Nursery                                                                                                                                                                                                                                    | 21 (4.1%)         | 228 (5%)           | 0.35    |
| <b>Laboratory (first values)</b>                                                                                                                                                                                                           |                   |                    |         |
| Serum creatinine, mg/dl                                                                                                                                                                                                                    | 0.6 (0.4,0.8)     | 0.5 (0.3,0.7)      | <0.01   |
| eGFR, ml/min per 1.73 m <sup>2</sup>                                                                                                                                                                                                       | 73.6 (28.4,114.4) | 101.8 (62.9,133.2) | <0.01   |
| BUN, mg/dl                                                                                                                                                                                                                                 | 14 (10,21)        | 11 (8,16)          | <0.01   |
| Glucose, mg/dl                                                                                                                                                                                                                             | 100 (76,129)      | 100 (83,128)       | 0.39    |
| Bicarbonate, mmol/L                                                                                                                                                                                                                        | 20.9 (18,23.1)    | 21 (18.8,23.6)     | <0.01   |
| Calcium, mg/dl                                                                                                                                                                                                                             | 8.9 (7.9,9.5)     | 9.3 (8.7,9.8)      | <0.01   |
| Platelet count, x1000/ $\mu$ L                                                                                                                                                                                                             | 227 (156,313)     | 257 (186,344)      | <0.01   |
| Lymphocyte percent, %                                                                                                                                                                                                                      | 21 (8,36)         | 21.8 (9,37.4)      | 0.89    |
| INR measured (%)                                                                                                                                                                                                                           | 311 (60.3%)       | 1345 (29.5%)       | <0.01   |
| Fibrinogen measured (%)                                                                                                                                                                                                                    | 191 (37%)         | 306 (6.7%)         | <0.01   |
| Lactate measured (%)                                                                                                                                                                                                                       | 302 (58.5%)       | 1645 (36.1%)       | <0.01   |
| <b>Medication,<sup>a</sup> n (%)</b>                                                                                                                                                                                                       |                   |                    |         |
| Loop diuretic                                                                                                                                                                                                                              | 289 (56%)         | 633 (13.9%)        | <0.01   |
| Vasopressor                                                                                                                                                                                                                                | 198 (38.4%)       | 331 (7.3%)         | <0.01   |
| Chemotherapy                                                                                                                                                                                                                               | 72 (14%)          | 455 (10%)          | 0.01    |
| Sodium bicarbonate                                                                                                                                                                                                                         | 131 (25.4%)       | 222 (4.9%)         | <0.01   |
| Calcium gluconate                                                                                                                                                                                                                          | 106 (20.5%)       | 110 (2.4%)         | <0.01   |
| Alprostadil                                                                                                                                                                                                                                | 16 (3.1%)         | 27 (0.6%)          | <0.01   |
| Carboplatin                                                                                                                                                                                                                                | 5 (1%)            | 8 (0.2%)           | <0.01   |
| Foscarnet                                                                                                                                                                                                                                  | 4 (0.8%)          | 1 (0%)             | <0.01   |
| Paclitaxel                                                                                                                                                                                                                                 | 1 (0.2%)          | 1 (0%)             | <0.01   |
| Nimodipine                                                                                                                                                                                                                                 | 1 (0.2%)          | 0 (0%)             | <0.01   |
| <b>Procedures, n (%)</b>                                                                                                                                                                                                                   |                   |                    |         |
| Mechanical ventilation                                                                                                                                                                                                                     | 150 (29.1%)       | 325 (7.1%)         | <0.01   |
| RBC Transfusion                                                                                                                                                                                                                            | 305 (59.1%)       | 845 (18.5%)        | <0.01   |
| <b>Secondary outcomes</b>                                                                                                                                                                                                                  |                   |                    |         |
| Inpatient mortality, n (%)                                                                                                                                                                                                                 | 57 (11%)          | 41 (0.9%)          | <0.01   |
| Length of stay, days (range)                                                                                                                                                                                                               | 17.1 (6.4,52.3)   | 4.2 (2.1,9.3)      | <0.01   |
| Data are presented as median (IQR) or proportion. <sup>a</sup> If a medication was ever given during hospitalization for non-AKI encounters or prior to AKI for AKI encounters. INR, international normalized ratio; RBC, red blood cells. |                   |                    |         |

**Supplemental Table 3.** Regression-based prediction models' coefficients and odds ratios.

|                              | Coefficient | Standard Error | 95% Confidence Interval |          | Odds Ratio | Standard Error | 95% Confidence Interval |          | Z score | P> z   |
|------------------------------|-------------|----------------|-------------------------|----------|------------|----------------|-------------------------|----------|---------|--------|
| <b>Clinical model</b>        |             |                |                         |          |            |                |                         |          |         |        |
| Chemotherapy use             | 1.255421    | 0.172388       | 0.917546                | 1.593296 | 3.509316   | 0.604966       | 2.50314                 | 4.91994  | 7.28    | <0.001 |
| BUN                          | 0.033048    | 0.005163       | 0.022929                | 0.043168 | 1.0336     | 0.005337       | 1.023194                | 1.044113 | 6.40    | <0.001 |
| Calcium                      | -0.32967    | 0.059793       | -0.44686                | -0.21248 | 0.71916    | 0.043001       | 0.639632                | 0.808578 | -5.51   | <0.001 |
| Lactate <sup>a</sup>         | 0.60651     | 0.115204       | 0.380715                | 0.832305 | 1.83402    | 0.211286       | 1.463331                | 2.298612 | 5.26    | <0.001 |
| ICU admission                | 0.595966    | 0.12527        | 0.350442                | 0.84149  | 1.814783   | 0.227337       | 1.419695                | 2.319821 | 4.76    | <0.001 |
| Creatinine                   | 0.829801    | 0.197916       | 0.441892                | 1.217709 | 2.292861   | 0.453794       | 1.555648                | 3.379436 | 4.19    | <0.001 |
| Pressor use                  | 0.516302    | 0.152033       | 0.218324                | 0.814281 | 1.67582    | 0.254779       | 1.24399                 | 2.257551 | 3.40    | 0.001  |
| Weight                       | 0.008       | 0.002386       | 0.003323                | 0.012677 | 1.008032   | 0.002405       | 1.003329                | 1.012757 | 3.35    | 0.001  |
| Bicarbonate                  | -0.00935    | 0.013795       | -0.03638                | 0.01769  | 0.990697   | 0.013666       | 0.964271                | 1.017848 | -0.68   | 0.498  |
| Mechanical ventilation       | 0.073266    | 0.157288       | -0.23501                | 0.381545 | 1.076017   | 0.169245       | 0.790561                | 1.464546 | 0.47    | 0.641  |
| Intercept                    | -2.20092    | 0.693849       | -3.56083                | -0.841   | 0.110702   | 0.07681        | 0.028415                | 0.431281 | -3.17   | 0.002  |
| <b>Lasso model</b>           |             |                |                         |          |            |                |                         |          |         |        |
| Glucose                      | 0.003391    | 0.000558       | 0.002298                | 0.004484 | 1.003397   | 0.00056        | 1.002301                | 1.004494 | 6.08    | <0.001 |
| Time since admission         | -0.35862    | 0.059802       | -0.47583                | -0.24141 | 0.698642   | 0.04178        | 0.621371                | 0.785522 | -6.00   | <0.001 |
| BUN                          | 0.030068    | 0.005139       | 0.019996                | 0.04014  | 1.030525   | 0.005296       | 1.020198                | 1.040957 | 5.85    | <0.001 |
| INR <sup>a</sup>             | 0.59734     | 0.108152       | 0.385366                | 0.809313 | 1.817278   | 0.196542       | 1.470153                | 2.246364 | 5.52    | <0.001 |
| Δ creatinine 48 hours        | 3.133266    | 0.588987       | 1.978872                | 4.287659 | 22.9488    | 13.51655       | 7.234581                | 72.79585 | 5.32    | <0.001 |
| Sodium bicarbonate use       | 0.763901    | 0.181498       | 0.408171                | 1.11963  | 2.146633   | 0.38961        | 1.504064                | 3.063722 | 4.21    | <0.001 |
| Alprostadil use              | 1.374857    | 0.39072        | 0.60906                 | 2.140653 | 3.954509   | 1.545104       | 1.838702                | 8.504989 | 3.52    | <0.001 |
| Calcium                      | -0.17351    | 0.059226       | -0.2896                 | -0.05743 | 0.840705   | 0.049792       | 0.748566                | 0.944185 | -2.93   | 0.003  |
| Creatinine                   | 0.462358    | 0.18594        | 0.097923                | 0.826793 | 1.587814   | 0.295238       | 1.102878                | 2.285977 | 2.49    | 0.013  |
| Calcium gluconate use        | 0.43878     | 0.243384       | -0.03824                | 0.915804 | 1.550814   | 0.377443       | 0.962478                | 2.498783 | 1.80    | 0.071  |
| Intercept                    | -2.63584    | 0.555438       | -3.72448                | -1.5472  | 0.071659   | 0.039802       | 0.024126                | 0.212843 | -4.75   | <0.001 |
| <b>Top AUC model</b>         |             |                |                         |          |            |                |                         |          |         |        |
| BUN                          | 0.031084    | 0.004733       | 0.021808                | 0.04036  | 1.031572   | 0.004882       | 1.022047                | 1.041186 | 6.57    | <0.001 |
| Glucose                      | 0.003321    | 0.000555       | 0.002234                | 0.004408 | 1.003327   | 0.000557       | 1.002236                | 1.004418 | 5.99    | <0.001 |
| Oxygen saturation            | -0.0391     | 0.007343       | -0.05349                | -0.02471 | 0.961653   | 0.007061       | 0.947912                | 0.975592 | -5.33   | <0.001 |
| Δ creatinine 48 hours        | 3.180922    | 0.599963       | 2.005016                | 4.356827 | 24.06893   | 14.44046       | 7.426213                | 78.00924 | 5.30    | <0.001 |
| Time since admission         | -0.24528    | 0.06027        | -0.3634                 | -0.12715 | 0.782489   | 0.047161       | 0.695307                | 0.880603 | -4.07   | <0.001 |
| Respiratory rate             | -0.00995    | 0.003029       | -0.01588                | -0.00401 | 0.990104   | 0.002999       | 0.984244                | 0.995999 | -3.28   | 0.001  |
| Calcium                      | -0.1994     | 0.062739       | -0.32236                | -0.07643 | 0.819224   | 0.051397       | 0.724434                | 0.926416 | -3.18   | 0.001  |
| Platelet count               | -0.00125    | 0.000437       | -0.00211                | -0.0004  | 0.998747   | 0.000436       | 0.997893                | 0.999602 | -2.87   | 0.004  |
| Lymphocyte percent           | -0.00592    | 0.003172       | -0.01213                | 0.000301 | 0.994101   | 0.003154       | 0.987939                | 1.000301 | -1.87   | 0.062  |
| Creatinine                   | 0.287709    | 0.189704       | -0.0841                 | 0.659522 | 1.333369   | 0.252946       | 0.919335                | 1.933868 | 1.52    | 0.129  |
| Intercept                    | 2.497134    | 0.965801       | 0.6042                  | 4.390068 | 12.14763   | 11.73219       | 1.829787                | 80.64593 | 2.59    | 0.010  |
| <b>Forward model</b>         |             |                |                         |          |            |                |                         |          |         |        |
| Nimodipine use               | 3.837853    | 0.121538       | 3.599644                | 4.076063 | 46.42571   | 5.642484       | 36.58519                | 58.91309 | 31.58   | <0.001 |
| Time since admission         | -0.7377     | 0.05763        | -0.85065                | -0.62475 | 0.478213   | 0.02756        | 0.427136                | 0.535397 | -12.80  | <0.001 |
| Foscarnet use                | 3.239226    | 0.355951       | 2.541576                | 3.936876 | 25.51396   | 9.081707       | 12.69966                | 51.25822 | 9.10    | <0.001 |
| BUN                          | 0.036629    | 0.004052       | 0.028687                | 0.04457  | 1.037308   | 0.004203       | 1.029102                | 1.045579 | 9.04    | <0.001 |
| Carboplatin use              | 2.734362    | 0.369992       | 2.009191                | 3.459533 | 15.39992   | 5.697848       | 7.457285                | 31.80213 | 7.39    | <0.001 |
| RBC Transfusion              | 0.640064    | 0.121263       | 0.402393                | 0.877735 | 1.896602   | 0.229987       | 1.495399                | 2.405444 | 5.28    | <0.001 |
| Loop diuretic use            | 0.674762    | 0.137812       | 0.404656                | 0.944869 | 1.963566   | 0.270603       | 1.498786                | 2.572477 | 4.90    | <0.001 |
| Sodium bicarbonate use       | 0.857524    | 0.180742       | 0.503277                | 1.211772 | 2.357317   | 0.426066       | 1.654132                | 3.359432 | 4.74    | <0.001 |
| Fibrinogen <sup>a</sup>      | 0.614002    | 0.14651        | 0.326848                | 0.901157 | 1.847812   | 0.270723       | 1.386591                | 2.46245  | 4.19    | <0.001 |
| Paclitaxel use               | 6.129291    | 1.647324       | 2.900596                | 9.357986 | 459.1106   | 756.3037       | 18.18498                | 11591.02 | 3.72    | <0.001 |
| Intercept                    | -3.35249    | 0.119794       | -3.58728                | -3.1177  | 0.034997   | 0.004192       | 0.027674                | 0.044259 | -27.99  | <0.001 |
| <b>Genetic model</b>         |             |                |                         |          |            |                |                         |          |         |        |
| Time since admission         | -0.64517    | 0.060229       | -0.76322                | -0.52713 | 0.524572   | 0.031594       | 0.466163                | 0.590299 | -10.71  | <0.001 |
| General Pediatrics admission | -1.29355    | 0.198857       | -1.68331                | -0.9038  | 0.274294   | 0.054545       | 0.185759                | 0.405027 | -6.50   | <0.001 |
| Loop diuretic use            | 0.810097    | 0.140097       | 0.535511                | 1.084683 | 2.248126   | 0.314957       | 1.708321                | 2.958501 | 5.78    | <0.001 |
| BUN                          | 0.029493    | 0.005114       | 0.01947                 | 0.039516 | 1.029932   | 0.005267       | 1.019661                | 1.040307 | 5.77    | <0.001 |
| RBC Transfusion              | 0.680983    | 0.118269       | 0.449181                | 0.912785 | 1.975819   | 0.233677       | 1.567028                | 2.491251 | 5.76    | <0.001 |
| Glucose                      | 0.003262    | 0.000579       | 0.002128                | 0.004396 | 1.003267   | 0.000581       | 1.00213                 | 1.004406 | 5.64    | <0.001 |
| Sodium bicarbonate use       | 0.857802    | 0.172809       | 0.519103                | 1.196502 | 2.357973   | 0.407479       | 1.68052                 | 3.308522 | 4.96    | <0.001 |
| Chemotherapy use             | 0.821921    | 0.175061       | 0.478808                | 1.165035 | 2.274867   | 0.39824        | 1.614149                | 3.206034 | 4.70    | <0.001 |
| Creatinine                   | 0.752208    | 0.19168        | 0.376522                | 1.127894 | 2.121679   | 0.406683       | 1.457207                | 3.089142 | 3.92    | <0.001 |
| Alprostadil use              | 1.113824    | 0.414417       | 0.301581                | 1.926067 | 3.045983   | 1.262308       | 1.351994                | 6.862465 | 2.69    | 0.007  |
| Intercept                    | -4.05392    | 0.182843       | -4.41229                | -3.69556 | 0.017354   | 0.003173       | 0.012127                | 0.024834 | -22.17  | <0.001 |

<sup>a</sup> Transformed into categorical variables (measured vs not measured) due to missingness > 25%. BUN, blood urea nitrogen; ICU, intensive care unit; INR, international normalized ratio; RBC, red blood cells; Spo2, oxygen saturation; Δ creatinine 48 hours, change in serum creatinine within the last 48 hours.

**Supplemental Table 4:** Genetic algorithm model operating points applied to the internal validation cohort. The choice of threshold points should be decided based on the risk of the potential intervention and individual health systems may have to make their own choices. A suggested low-risk cut-off threshold point of 0.08 shows a high negative predictive value of 97.9%, includes a large number of patients but a small proportion were falsely negative and therefore it can aid in low-risk, screening interventions. A suggested high-risk cut-off threshold point of 0.24 is a highly specific operating point (specificity of 99.6%) at which the ratio of true positive to false positive alerts is 1:2.8, therefore it can be used to identify patients at imminent AKI to implement more intensive interventions. Given the low baseline rate of AKI episodes (2.8%), it would be hard to make a test with a high PPV, but a PPV of 26.6% represents a 12-fold increase over baseline (LR+ of 12.5).

| Cut point      | True positive <sup>a</sup> | False positive <sup>a</sup> | TP:FP <sup>a</sup> | True negative <sup>a</sup> | False negative <sup>a</sup> | Sensitivity | Specificity | PPV   | NPV   | LR+  | LR- | OR   | Median (IQR) time from alert to AKI, hours |
|----------------|----------------------------|-----------------------------|--------------------|----------------------------|-----------------------------|-------------|-------------|-------|-------|------|-----|------|--------------------------------------------|
| 0 <sup>b</sup> | 14,099                     | 486,003                     | 1:34.5             | 0                          | 0                           | 100.0%      | 0.0%        | 2.8%  | -     | 1.0  | -   | -    | 159.1 (52.3-384.1)                         |
| 0.04           | 7,593                      | 99,111                      | 1:13.1             | 386,892                    | 6,506                       | 53.9%       | 79.6%       | 7.1%  | 98.3% | 2.6  | 0.6 | 4.6  | 136.6 (42.7-299.7)                         |
| 0.08           | 4,055                      | 28,526                      | 1:7.0              | 457,477                    | 10,044                      | 28.8%       | 94.1%       | 12.4% | 97.9% | 4.9  | 0.8 | 6.5  | 142.7 (32.7-300.3)                         |
| 0.12           | 2,396                      | 11,993                      | 1:5.0              | 474,010                    | 11,703                      | 17.0%       | 97.5%       | 16.7% | 97.6% | 6.9  | 0.9 | 8.1  | 124.9 (24.7-284.5)                         |
| 0.16           | 1,420                      | 5,620                       | 1:4.0              | 480,383                    | 12,679                      | 10.1%       | 98.8%       | 20.2% | 97.4% | 8.7  | 0.9 | 9.6  | 113.7 (13.3-252.9)                         |
| 0.20           | 953                        | 3,274                       | 1:3.4              | 482,729                    | 13,146                      | 6.8%        | 99.3%       | 22.5% | 97.3% | 10.0 | 0.9 | 10.7 | 116.2 (8.8-259.7)                          |
| 0.24           | 749                        | 2,071                       | 1:2.8              | 483,932                    | 13,350                      | 5.3%        | 99.6%       | 26.6% | 97.3% | 12.5 | 1.0 | 13.1 | 23.7 (5.3-343.7)                           |
| 0.28           | 642                        | 1,394                       | 1:2.2              | 484,609                    | 13,457                      | 4.6%        | 99.7%       | 31.5% | 97.3% | 15.9 | 1.0 | 16.6 | 10 (4.2-328.9)                             |
| 0.32           | 440                        | 781                         | 1:1.8              | 485,222                    | 13,659                      | 3.1%        | 99.8%       | 36.0% | 97.3% | 19.4 | 1.0 | 20.0 | 7.6 (3.3-24.5)                             |
| 0.36           | 355                        | 558                         | 1:1.6              | 485,445                    | 13,744                      | 2.5%        | 99.9%       | 38.9% | 97.2% | 21.9 | 1.0 | 22.5 | 7.1 (2.5-19.5)                             |

<sup>a</sup> The sensitivity analysis was performed at the timepoint level. For example, there were 749 timepoints in all the 2299 encounters in the internal validation cohort that crossed the 0.24 threshold point (alert) and lead to an AKI in the next 48 hours compared to 2,071 timepoints that did not lead to an AKI in the next 48 hours. <sup>b</sup> The cut point of 0 represents a baseline rate of all timepoints of the 2299 encounters in the validation cohort. At baseline, 14,099/486,003 (2.8%) timepoints were associated with AKI events afterwards. LR+, positive likelihood ratio; LR-, negative likelihood ratio; NPV, negative predictive value; OR, odds ratio; PPV, positive predictive value; TP:FP, true positive to false positive ratio.



**Supplemental Table 5:** Genetic algorithm model operating points applied to the external validation cohort. The suggested low-risk threshold point of 0.08 showed a comparable performance to the internal validation cohort, but the high-risk threshold point had no true positives due to the small number of patients that crossed this threshold in this low-acuity cohort.

| Cut point      | True positive <sup>a</sup> | False positive <sup>a</sup> | TP:FP <sup>a</sup> | True negative <sup>a</sup> | False negative <sup>a</sup> | Sensitivity | Specificity | PPV   | NPV   | LR+  | LR- | OR   | Median (IQR) time from alert to AKI, hours |
|----------------|----------------------------|-----------------------------|--------------------|----------------------------|-----------------------------|-------------|-------------|-------|-------|------|-----|------|--------------------------------------------|
| 0 <sup>b</sup> | 1,981                      | 278,045                     | 1:140.4            | 0                          | 0                           | 100.0%      | 0.0%        | 0.7%  | -     | 1.0  | -   | -    | 153.3(57.8-336.2)                          |
| 0.04           | 1,109                      | 36,049                      | 1:32.5             | 241,996                    | 872                         | 56.0%       | 87.0%       | 3.0%  | 99.6% | 4.3  | 0.5 | 8.5  | 148.6(59.6-338.9)                          |
| 0.08           | 526                        | 7,416                       | 1:14.1             | 270,629                    | 1,455                       | 26.6%       | 97.3%       | 6.6%  | 99.5% | 10.0 | 0.8 | 13.2 | 139.3(65.9-393.6)                          |
| 0.12           | 337                        | 2,240                       | 1:6.6              | 275,805                    | 1,644                       | 17.0%       | 99.2%       | 13.1% | 99.4% | 21.1 | 0.8 | 25.2 | 87.6(26.5-171.1)                           |
| 0.16           | 104                        | 764                         | 1:7.3              | 277,281                    | 1,877                       | 5.2%        | 99.7%       | 12.0% | 99.3% | 19.1 | 1.0 | 20.1 | 23.6(5.1-58.2)                             |
| 0.20           | 4                          | 500                         | 1:125.0            | 277,545                    | 1,977                       | 0.2%        | 99.8%       | 0.8%  | 99.3% | 1.1  | 1.0 | 1.1  | 421.1(14.6-422.8)                          |
| 0.24           | 0                          | 341                         | -                  | 277,704                    | 1,981                       | 0.0%        | 99.9%       | 0.0%  | 99.3% | 0.0  | 1.0 | 0.0  | 422.2(420.7-423)                           |

<sup>a</sup> The sensitivity analysis was performed at the timepoint level. For example, there were 526 timepoints in all the 1102 encounters in external validation cohort that crossed the 0.08 threshold point (alert) and lead to an AKI in the next 48 hours compared to 7,416 timepoints that did not lead to an AKI in the next 48 hours. <sup>b</sup> The cut point of 0 represents a baseline rate of all timepoints of the 1102 encounters in the external validation cohort. At baseline, 1,981/278,045 (0.7%) timepoints were associated with AKI events afterwards. LR+, positive likelihood ratio; LR-, negative likelihood ratio; NPV, negative predictive value; OR, odds ratio; PPV, positive predictive value; TP:FP, true positive to false positive ratio.

**Supplemental Table 6:** Low-risk cut-off threshold (0.08) analysis using the genetic algorithm model in age subgroups (on the internal validation cohort).

| Cohort                                                     | Sensitivity | Specificity | PPV   | NPV   |
|------------------------------------------------------------|-------------|-------------|-------|-------|
| <b>Entire validation cohort</b><br>n=2299 (AKI=207, 9%)    | 28.8%       | 94.1%       | 12.4% | 97.9% |
| <b>Newborns</b> (birth–27 days)<br>n=492 (AKI=70, 14.2%)   | 32.8%       | 76.4%       | 24.2% | 83.2% |
| <b>Infants</b> (28 days–12 months)<br>n=256 (AKI=16, 6.2%) | 27.0%       | 90.5%       | 49.5% | 78.3% |
| <b>Children</b> (1-12 years)<br>n=913 (AKI=68, 7.4%)       | 30.7%       | 89.8%       | 58.7% | 73.2% |
| <b>Adolescents</b> (12-18 years)<br>n=632 (AKI=53, 8.3%)   | 21.5%       | 67.1%       | 25.3% | 62.2% |

NPV, negative predictive value; PPV, positive predictive value

**Supplemental Table 7:** High-risk cut-off threshold (0.24) analysis using the genetic algorithm model in age subgroups (on the internal validation cohort).

| Cohort                                                     | Sensitivity | Specificity | PPV    | NPV   |
|------------------------------------------------------------|-------------|-------------|--------|-------|
| <b>Entire validation cohort</b><br>n=2299 (AKI=207, 9%)    | 5.3%        | 99.6%       | 26.6%  | 97.3% |
| <b>Newborns</b> (birth–27 days)<br>n=492 (AKI=70, 14.2%)   | 3.8%        | 99.1%       | 48.3%  | 81.7% |
| <b>Infants</b> (28 days–12 months)<br>n=256 (AKI=16, 6.2%) | 0.2%        | 99.2%       | 6.7%   | 74.3% |
| <b>Children</b> (1-12 years)<br>n=913 (AKI=68, 7.4%)       | 9.8%        | 100.0%      | 100.0% | 70.0% |
| <b>Adolescents</b> (12-18 years)<br>n=632 (AKI=53, 8.3%)   | 5.9%        | 95.4%       | 40.1%  | 66.1% |

NPV, negative predictive value; PPV, positive predictive value

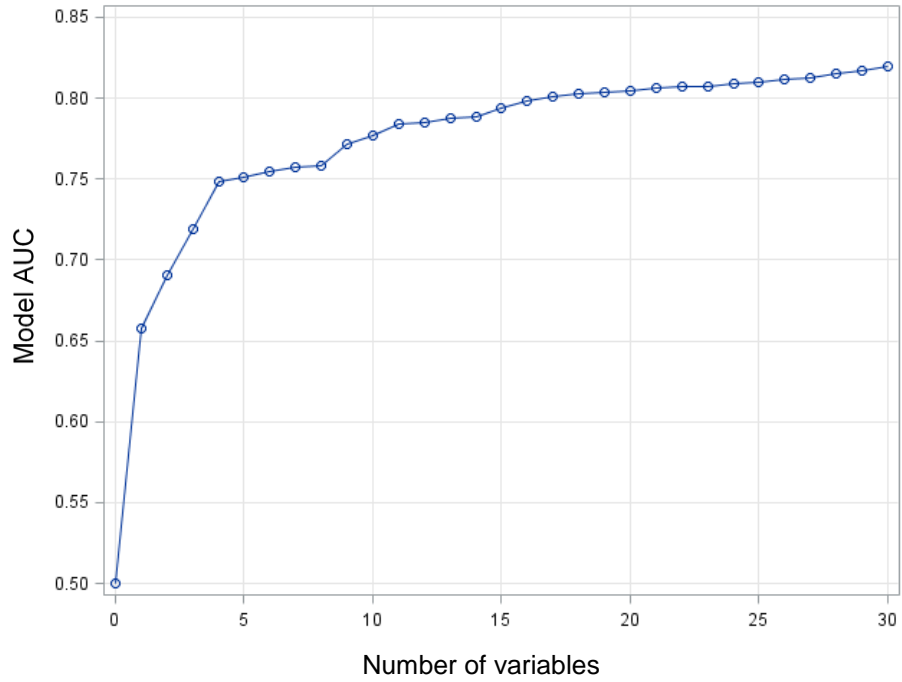

**Supplemental Figure 1:** Logistic regression analyses of incremental numbers of variables of the stepwise forward selection model. Model performance increases as additional variables are added, but there are diminishing returns after the first 10 variables.

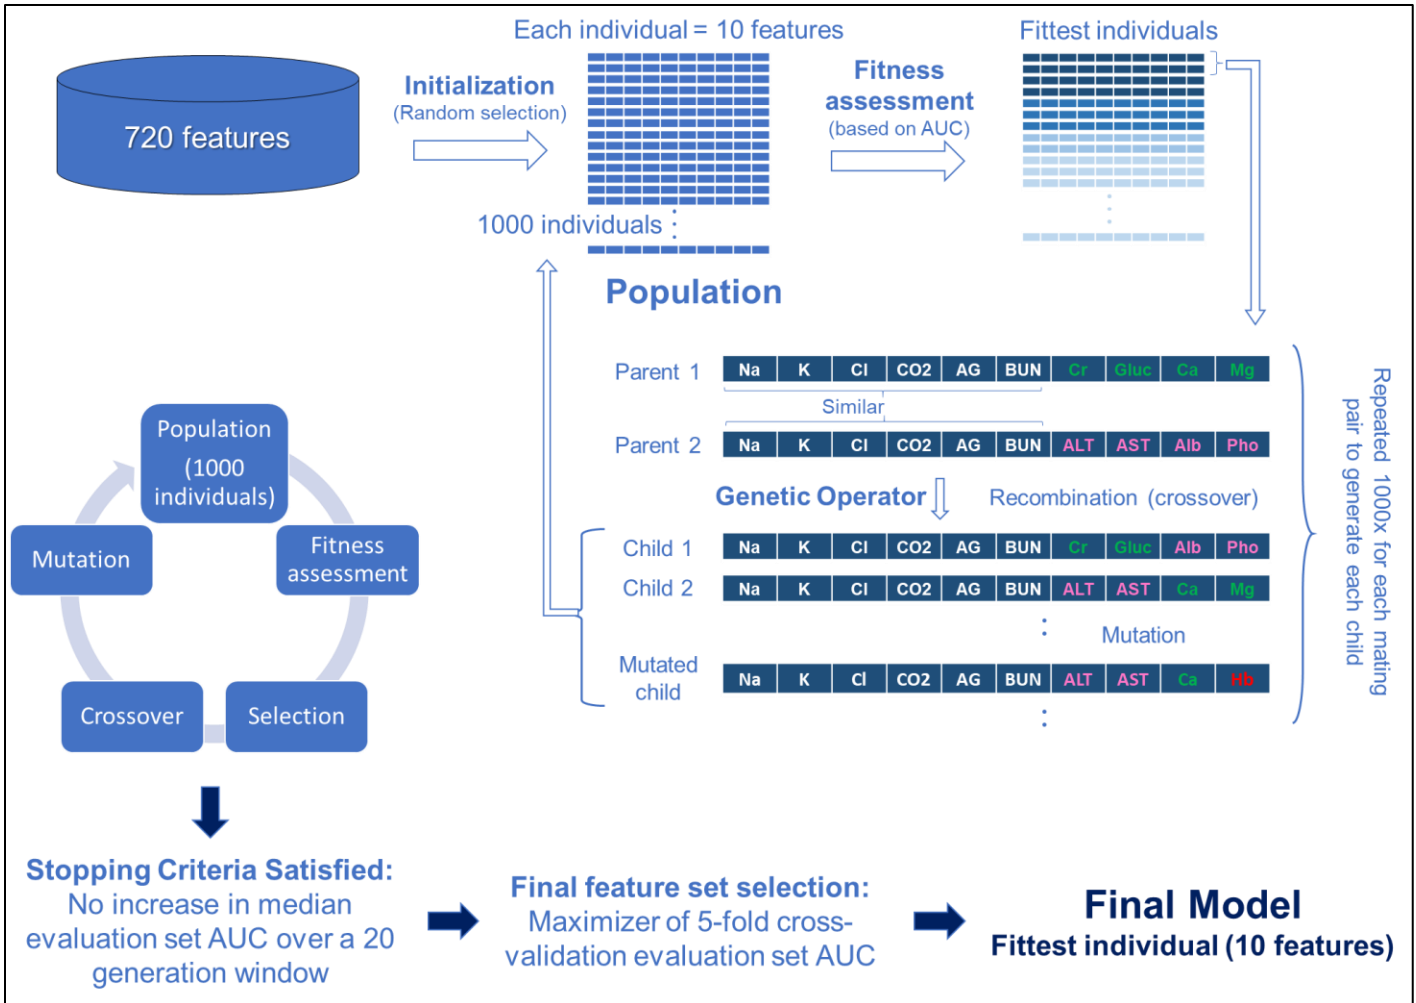

Supplemental Figure 2. Genetic algorithm feature selection process.

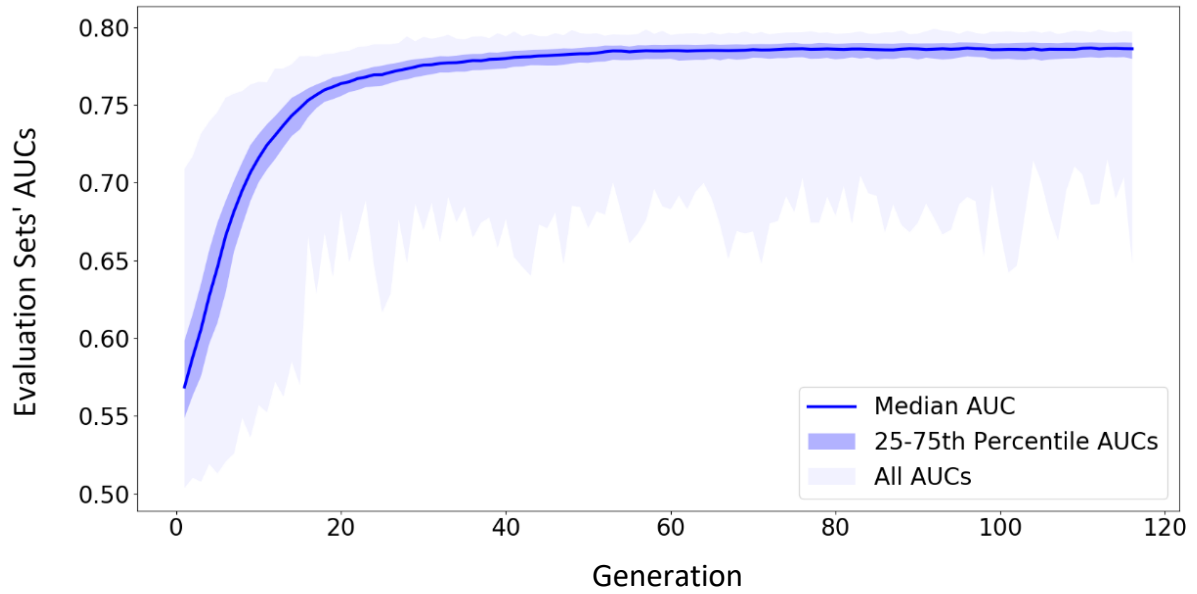

**Supplemental Figure 3:** Convergence in evaluation set (of derivation cohort) area under the receiver operating characteristic curve (AUC) of the genetic algorithm's population.

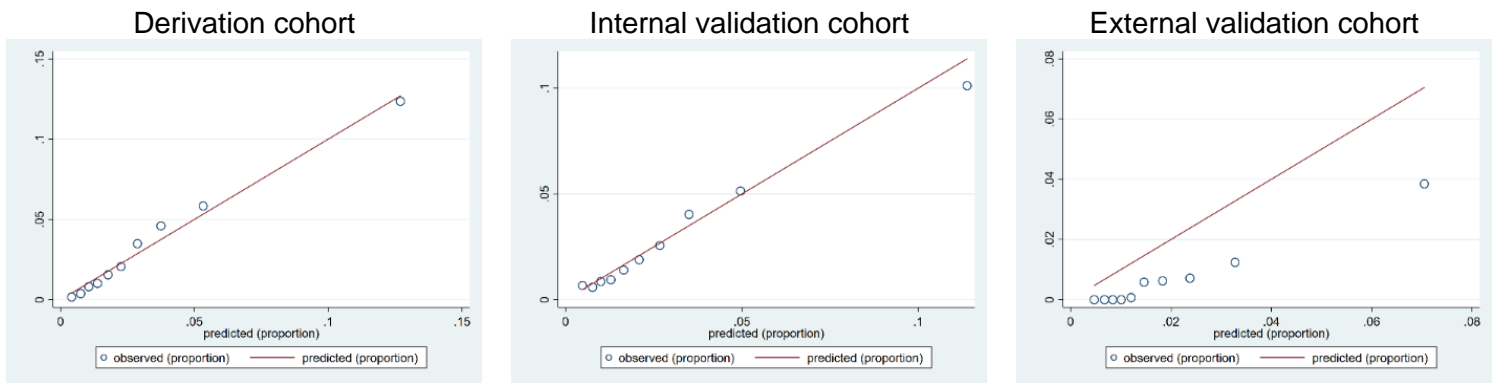

**Supplemental Figure 4:** Genetic algorithm model calibration curves. The prediction model is well calibrated in both derivation and internal validation cohorts. For prospective and external implementation, it would be appropriate to recalibrate the model on the local cohort.

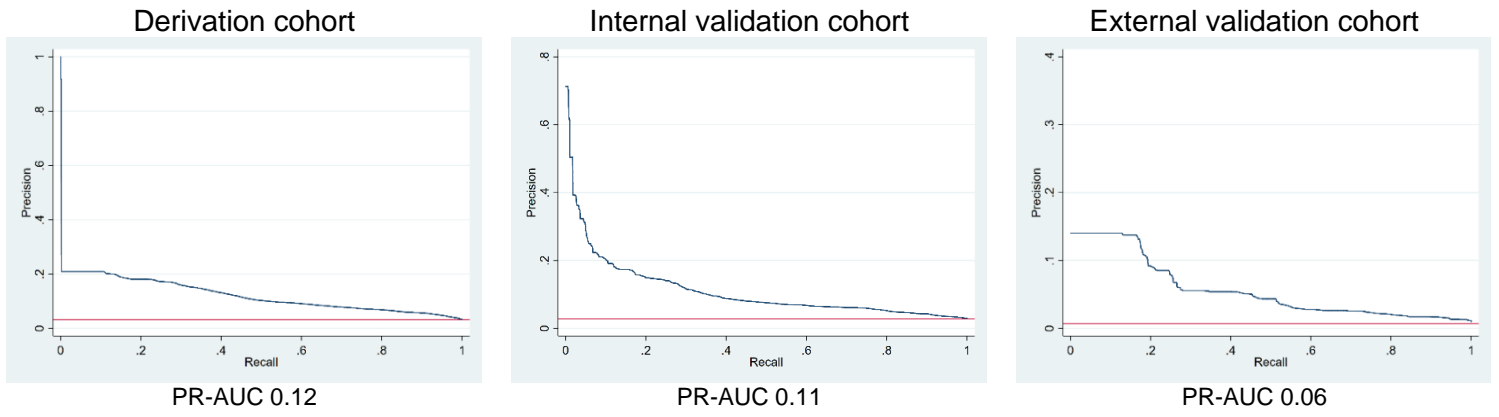

**Supplemental Figure 5:** Genetic algorithm model performance illustrated by a precision-recall curve. PR-AUC, the area under the precision–recall curve.



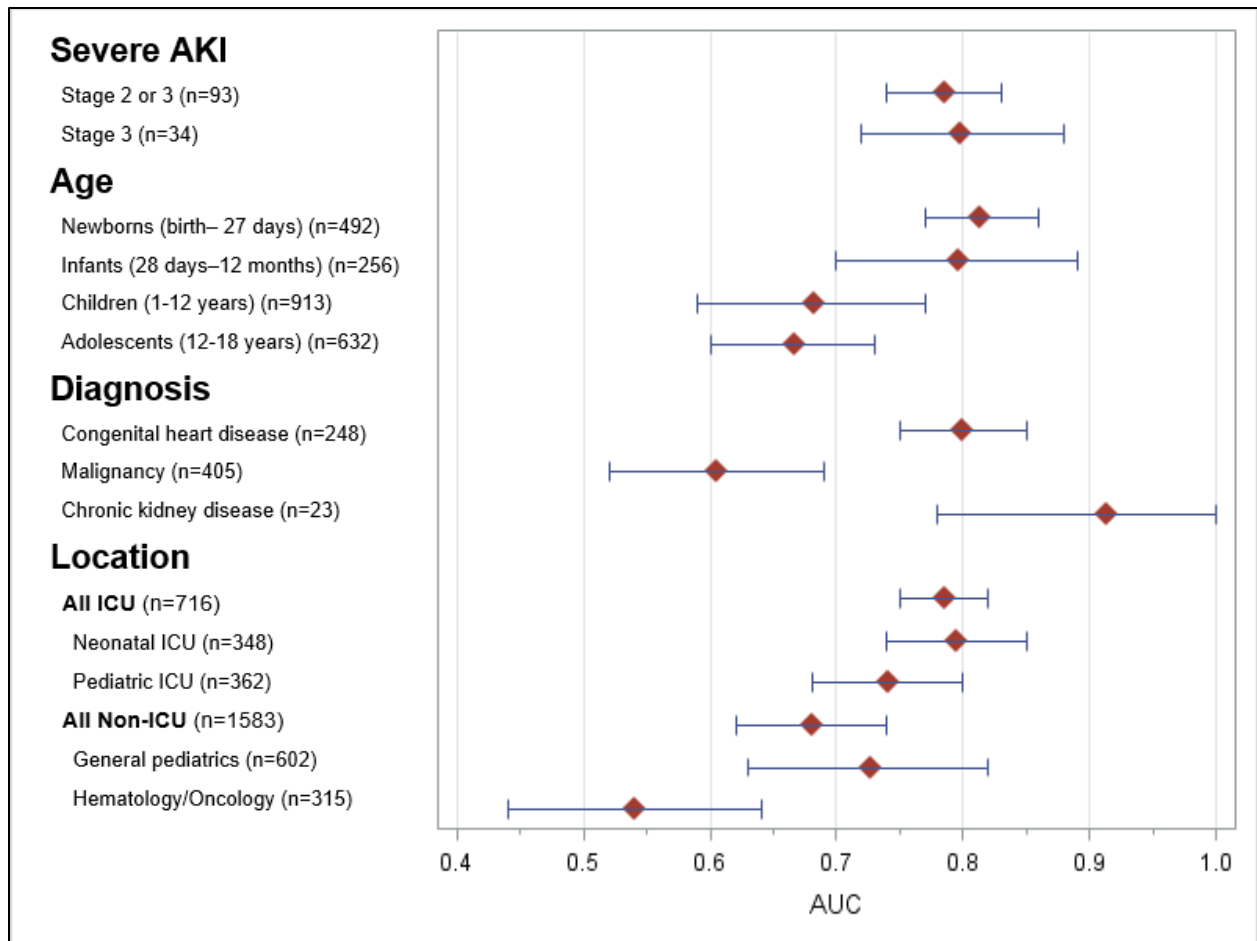

**Supplemental Figure 6.** Genetic model for the prediction of severe AKI and subgroup analyses in the internal validation cohort. The AUC is 0.79 (95% CI 0.74-0.83) for predicting severe AKI (stage 2 or 3) and 0.80 (95% 0.72-0.88) for stage 3 AKI. In newborns, the AUC is 0.81 (95% CI 0.77-0.86).

## Supplemental Methods. Genetic Algorithm Methodology:

Genetic algorithms model a population of genotypes and its temporal evolution, discretized as a sequence of generations. Several key components must be defined: a genotype representation, a fitness function and mating rules, and genetic recombination and mutation rules. These key components are used to produce the next generation in the sequence from the current one. A general implementation of genetic algorithms for feature selection is described below.

- Genotype Representation: A genotype is defined as a subset of  $k$  features chosen from the full feature set.
- Fitness Function: The derivation set is randomly split into training and evaluation sets with proportions  $\alpha$  and  $1 - \alpha$ , respectively. A model  $M$  is fit to the training set restricted to only the features in the genotype representation. The fitness function is defined as a performance metric  $P$  of the model when applied to the evaluation set. This procedure occurs for every genotype.
- Mating Rules: The fitness values over the population are used to generate a distribution  $F$  over the population describing their probability of being selected for mating. Mating pairs are then generated by randomly sampling from this distribution until the number of pairs equals the current population size  $n$ .
- Genetic Recombination: For each mating pair, overlapping features of the parent genotypes are first placed into the child genotype. The remaining non-overlapping features are uniformly sampled without replacement and given to the child until the child has  $k$  features.
- Genetic Mutation: After recombination, each child has their  $k$  features iterated through and randomly replaced by a new feature from the full feature set according to a probability set by the mutation rate  $r$ .

For our particular implementation, the hyperparameters chosen were  $\alpha = 2/3$ ,  $n = 1000$ ,  $k = 10$ ,  $r = 0.05$ ,  $M$  is logistic regression,  $P$  is the area under the receiving operator characteristic curve (AUC), and  $F$  is a linearly decreasing probability mass function (PMF) defined over the indices of the population reordered by fitness such that the worst performing genotype has probability 0. Furthermore, we incorporated elitism, a technique commonly used with genetic algorithms, which improves the rate of convergence. Elitism chooses the  $t$  best genotypes for a generation and produces a clone of them in the next generation; we set  $t = 3$ . We initialize the algorithm with uniformly randomly selected genotypes. The algorithm runs until a stopping criteria is met: a lack of improvement in the median evaluation AUC in the population over a 20 generation window. Once the stopping criteria is met, 5-fold cross validation is used to estimate a mean AUC for every genotype in the population. The algorithm returns the genotype that maximizes this statistic.
